# Supplementary material
Source: publisher site journal article supplement (https://www.dovepress.com/article/474643)
Supplement: Supplementary file 1 [file get_supplementary_file.php]

**Supplementary Figure 1**


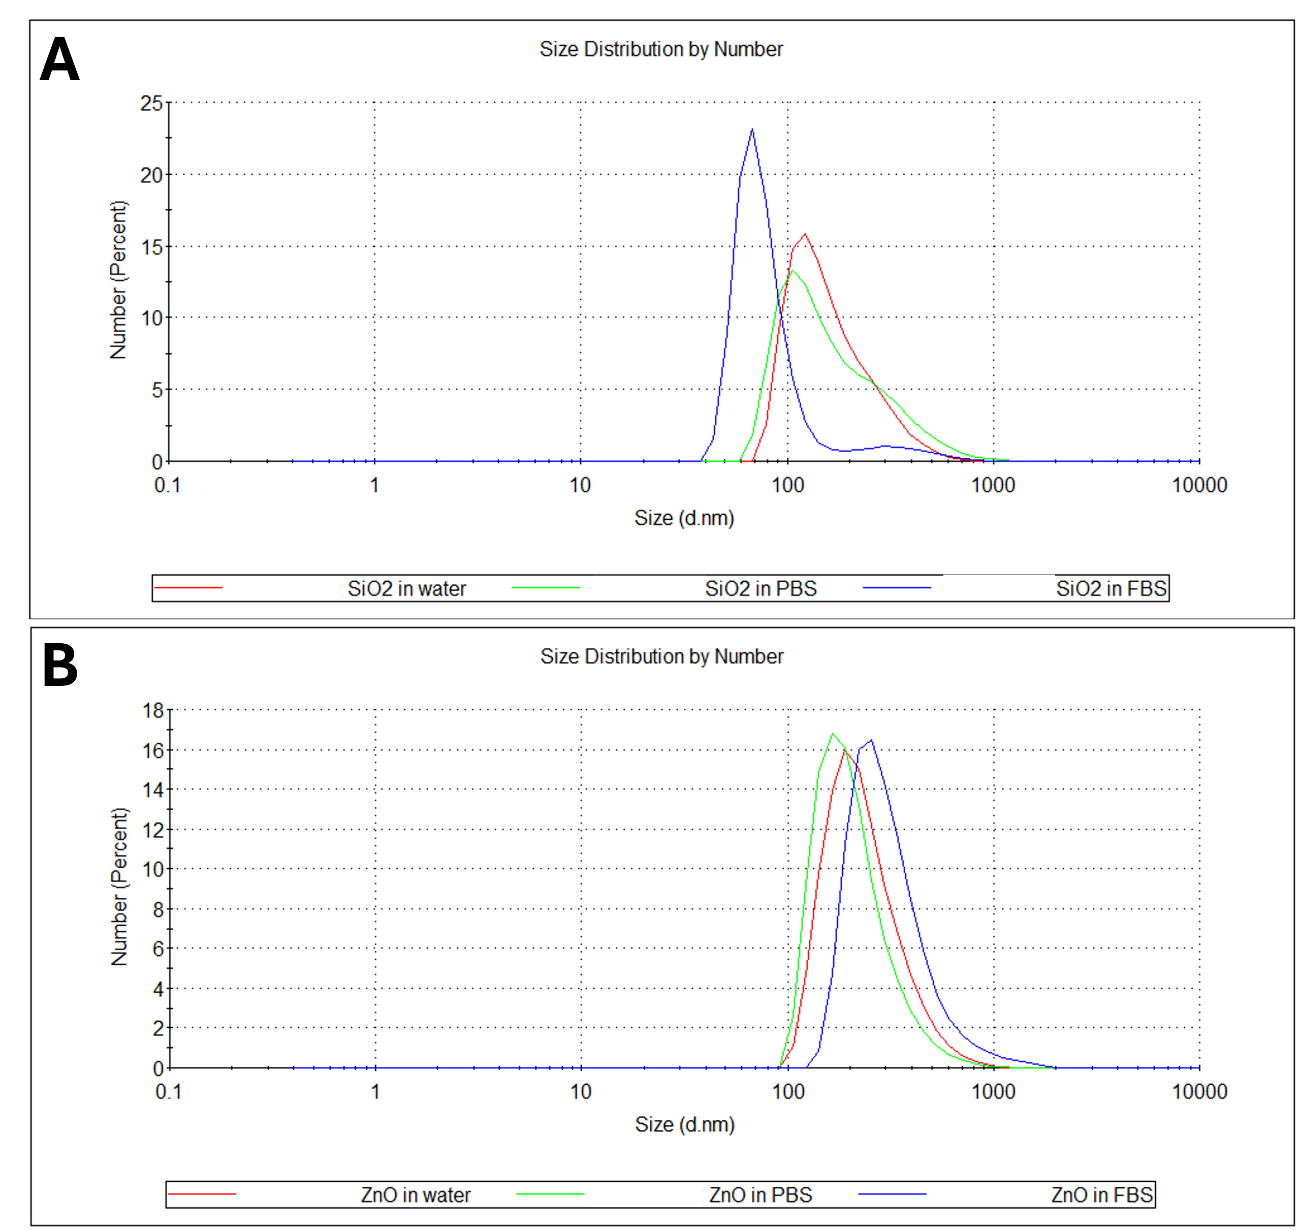


Figure S1. Comparison of the hydrodynamic size of (A) SiO2 and (B) ZnO NPs in aqueous, salt, and serum-supplemented medium.
